# Supplementary material for: Cutting Through the Noise: Predictors of Successful Online Message Retransmission in the First 8 Months of the COVID-19 Pandemic
Source: PubMed Central journal article supplement (PMC9195492; doi:10.1089/hs.2020.0200), 2021-02-18
Supplement: Supp_Table2.pdf [file Supp_Table2.pdf]

Table 2: Organizational Names and Associated Twitter Handles

| Name                                             | Handle            | Handle_2 | State | City | Admin. Level | Public Health | State Emergency Management | Governor | Mayor | Local Emergency Management | Population |
|--------------------------------------------------|-------------------|----------|-------|------|--------------|---------------|----------------------------|----------|-------|----------------------------|------------|
| ZMC Health Dept                                  | zmchd             |          |       |      | Local        | 1             | 0                          | 0        | 0     | 0                          | 0 NA       |
| DC Dept of Health                                | _dchealth         |          |       |      | State        | 1             | 0                          | 0        | 0     | 0                          | 0 NA       |
| Northampton Health                               | 01060health       |          |       |      | Local        | 1             | 0                          | 0        | 0     | 0                          | 0 NA       |
| Anne Arundel Health                              | aahealth          |          |       |      | Local        | 1             | 0                          | 0        | 0     | 0                          | 0 NA       |
| Ashland-Boyd Co. HD                              | abchdky           |          |       |      | Local        | 1             | 0                          | 0        | 0     | 0                          | 0 NA       |
| Alamance Health Dept                             | achealthdept      |          |       |      | Local        | 1             | 0                          | 0        | 0     | 0                          | 0 NA       |
| Nantucket Health Dpt                             | ackhealthdept     |          |       |      | Local        | 1             | 0                          | 0        | 0     | 0                          | 0 NA       |
| AllenCoPublicHealth                              | acpublichealth    |          |       |      | Local        | 1             | 0                          | 0        | 0     | 0                          | 0 NA       |
| Ark. Dept. of Health                             | adhpio            |          |       |      | State        | 1             | 0                          | 0        | 0     | 0                          | 0 NA       |
| Alaska DHSS                                      | alaska_dhss       |          |       |      | State        | 1             | 0                          | 0        | 0     | 0                          | 0 NA       |
| Allegan County HD                                | allegancountyhd   |          |       |      | Local        | 1             | 0                          | 0        | 0     | 0                          | 0 NA       |
| Allegany Co Health                               | alleganyhlthmd    |          |       |      | Local        | 1             | 0                          | 0        | 0     | 0                          | 0 NA       |
| Ala. Public Health                               | alpublichealth    |          |       |      | State        | 1             | 0                          | 0        | 0     | 0                          | 0 NA       |
| AppDistrictHD                                    | appdistricthd     |          |       |      | Local        | 1             | 0                          | 0        | 0     | 0                          | 0 NA       |
| Austin Public Health                             | auspublichealth   |          |       |      | Local        | 1             | 0                          | 0        | 0     | 0                          | 0 NA       |
| Avon Board of Health                             | avonboh           |          |       |      | Local        | 1             | 0                          | 0        | 0     | 0                          | 0 NA       |
| AZ Dept. of Health Verified account              | azdhs             |          |       |      | State        | 1             | 0                          | 0        | 0     | 0                          | 0 NA       |
| Barren River Health                              | barrenriverhd     |          |       |      | Local        | 1             | 0                          | 0        | 0     | 0                          | 0 NA       |
| Beach Cities Health                              | bchd              |          |       |      | Local        | 1             | 0                          | 0        | 0     | 0                          | 0 NA       |
| Brown County Health                              | bchd_georgetown   |          |       |      | Local        | 1             | 0                          | 0        | 0     | 0                          | 0 NA       |
| Barnstable Co Health                             | bchdcapecod       |          |       |      | Local        | 1             | 0                          | 0        | 0     | 0                          | 0 NA       |
| Bear River Health                                | bearriverhealth   |          |       |      | Local        | 1             | 0                          | 0        | 0     | 0                          | 0 NA       |
| BethlehemHealthDept                              | bethlehemhealth   |          |       |      | Local        | 1             | 0                          | 0        | 0     | 0                          | 0 NA       |
| BFHD                                             | bfhd              |          |       |      | Local        | 1             | 0                          | 0        | 0     | 0                          | 0 NA       |
| BHC Health Dept                                  | bhchd             |          |       |      | Local        | 1             | 0                          | 0        | 0     | 0                          | 0 NA       |
| B'more City Health Verified account              | bmore_healthy     |          |       |      | Local        | 1             | 0                          | 0        | 0     | 0                          | 0 NA       |
| Boone County Health                              | boonecohealth     |          |       |      | Local        | 1             | 0                          | 0        | 0     | 0                          | 0 NA       |
| Bo Co Public Health                              | bouldercocohealth |          |       |      | Local        | 1             | 0                          | 0        | 0     | 0                          | 0 NA       |
| Brant Health Unit                                | branthealthunit   |          |       |      | Local        | 1             | 0                          | 0        | 0     | 0                          | 0 NA       |
| CDC's Behavioral Risk Factor Surveillance System | brfss             |          |       |      | Federal      | 1             | 0                          | 0        | 0     | 0                          | 0 NA       |
| Brown Co Health Dept                             | browncohealth     |          |       |      | Local        | 1             | 0                          | 0        | 0     | 0                          | 0 NA       |
| Butler County Health                             | butlercounty_hd   |          |       |      | Local        | 1             | 0                          | 0        | 0     | 0                          | 0 NA       |
| BwD Public Health                                | bwdph             |          |       |      | Local        | 1             | 0                          | 0        | 0     | 0                          | 0 NA       |
| Cal. Co. Health Dept                             | calverthealth     |          |       |      | Local        | 1             | 0                          | 0        | 0     | 0                          | 0 NA       |
| CAPublicHealth                                   | capublichealth    |          |       |      | State        | 1             | 0                          | 0        | 0     | 0                          | 0 NA       |
| CarverCoPublicHealth                             | carvercoph        |          |       |      | Local        | 1             | 0                          | 0        | 0     | 0                          | 0 NA       |
| CCBH_Net                                         | ccbh_net          |          |       |      | Local        | 1             | 0                          | 0        | 0     | 0                          | 0 NA       |
| Clinton Co MO HD                                 | cchdmisouri       |          |       |      | Local        | 1             | 0                          | 0        | 0     | 0                          | 0 NA       |
| Clark Co Health Dept                             | cchealthdept      |          |       |      | Local        | 1             | 0                          | 0        | 0     | 0                          | 0 NA       |
| Carson City Health                               | cchealthed        |          |       |      | Local        | 1             | 0                          | 0        | 0     | 0                          | 0 NA       |
| CCPHD                                            | ccphd             |          |       |      | Local        | 1             | 0                          | 0        | 0     | 0                          | 0 NA       |
| CDC_eHealth Verified account                     | cdc_cancer        |          |       |      | Federal      | 1             | 0                          | 0        | 0     | 0                          | 0 NA       |
|                                                  | cdc_ehealth       |          |       |      | Federal      | 1             | 0                          | 0        | 0     | 0                          | 0 NA       |
|                                                  | cdc_eidjournal    |          |       |      | Federal      | 1             | 0                          | 0        | 0     | 0                          | 0 NA       |
|                                                  | cdc_ephracking    |          |       |      | Federal      | 1             | 0                          | 0        | 0     | 0                          | 0 NA       |
|                                                  | cdc_hivaidis      |          |       |      | Federal      | 1             | 0                          | 0        | 0     | 0                          | 0 NA       |
| NCBDDD Verified account                          | cdc_ncbddd        |          |       |      | Federal      | 1             | 0                          | 0        | 0     | 0                          | 0 NA       |
|                                                  | cdc_ncbddd        |          |       |      | Federal      | 1             | 0                          | 0        | 0     | 0                          | 0 NA       |
|                                                  | cdc_ncezid        |          |       |      | Federal      | 1             | 0                          | 0        | 0     | 0                          | 0 NA       |
|                                                  | cdc_tb            |          |       |      | Federal      | 1             | 0                          | 0        | 0     | 0                          | 0 NA       |
|                                                  | cdcchronic        |          |       |      | Federal      | 1             | 0                          | 0        | 0     | 0                          | 0 NA       |
| Dr. Tom Frieden Verified account                 | cdcdirector       |          |       |      | Federal      | 1             | 0                          | 0        | 0     | 0                          | 0 NA       |
| CDC Emergency Verified account                   | cdcemergency      |          |       |      | Federal      | 1             | 0                          | 0        | 0     | 0                          | 0 NA       |
|                                                  | cdcenvironment    |          |       |      | Federal      | 1             | 0                          | 0        | 0     | 0                          | 0 NA       |
|                                                  | cdcespanol        |          |       |      | Federal      | 1             | 0                          | 0        | 0     | 0                          | 0 NA       |
| CDC Flu Verified account                         | cdcflu            |          |       |      | Federal      | 1             | 0                          | 0        | 0     | 0                          | 0 NA       |
| FluGov Verified account                          | cdcflu            |          |       |      | Federal      | 1             | 0                          | 0        | 0     | 0                          | 0 NA       |
|                                                  | cdcgloblal        |          |       |      | Federal      | 1             | 0                          | 0        | 0     | 0                          | 0 NA       |
| CDC Verified account                             | cdcgov            |          |       |      | Federal      | 1             | 0                          | 0        | 0     | 0                          | 0 NA       |
|                                                  | cdchep            |          |       |      | Federal      | 1             | 0                          | 0        | 0     | 0                          | 0 NA       |
|                                                  | cdcinjry          |          |       |      | Federal      | 1             | 0                          | 0        | 0     | 0                          | 0 NA       |
|                                                  | cdckeny           |          |       |      | Federal      | 1             | 0                          | 0        | 0     | 0                          | 0 NA       |
|                                                  | cdcmakehealthez   |          |       |      | Federal      | 1             | 0                          | 0        | 0     | 0                          | 0 NA       |
| MMWR Verified account                            | cdcmwr            |          |       |      | Federal      | 1             | 0                          | 0        | 0     | 0                          | 0 NA       |
| CDC NPIN Verified account                        | cdcnpin           |          |       |      | Federal      | 1             | 0                          | 0        | 0     | 0                          | 0 NA       |
|                                                  | cdcobesity        |          |       |      | Federal      | 1             | 0                          | 0        | 0     | 0                          | 0 NA       |
|                                                  | cdcsouthafrica    |          |       |      | Federal      | 1             | 0                          | 0        | 0     | 0                          | 0 NA       |
|                                                  | cdcstd            |          |       |      | Federal      | 1             | 0                          | 0        | 0     | 0                          | 0 NA       |
| CDC Tobacco Free Verified account                | cdctobaccfree     |          |       |      | Federal      | 1             | 0                          | 0        | 0     | 0                          | 0 NA       |
|                                                  | cdctravel         |          |       |      | Federal      | 1             | 0                          | 0        | 0     | 0                          | 0 NA       |
| CDPHE                                            | cdphe             |          |       |      | State        | 1             | 0                          | 0        | 0     | 0                          | 0 NA       |
| C&D Public Health                                | cdphga            |          |       |      | Local        | 1             | 0                          | 0        | 0     | 0                          | 0 NA       |
| Cecil County Health                              | cecilcohealth     |          |       |      | Local        | 1             | 0                          | 0        | 0     | 0                          | 0 NA       |
| CGC Dept. of Health                              | cgpublichealth    |          |       |      | Local        | 1             | 0                          | 0        | 0     | 0                          | 0 NA       |
| Public Health                                    | chelandouglashd   |          |       |      | Local        | 1             | 0                          | 0        | 0     | 0                          | 0 NA       |

|                                       |                 |         |   |   |   |   |      |
|---------------------------------------|-----------------|---------|---|---|---|---|------|
| Chesco Health Verified account        | chescohealth    | Local   | 1 | 0 | 0 | 0 | 0 NA |
| ChiPublicHealth Verified account      | chipublichealth | Local   | 1 | 0 | 0 | 0 | 0 NA |
| CinciHealthDept                       | cincihealthdept | Local   | 1 | 0 | 0 | 0 | 0 NA |
| CityofSTLDOH                          | cityofstldoh    | Local   | 1 | 0 | 0 | 0 | 0 NA |
| CCCHD                                 | clarkcohealth   | Local   | 1 | 0 | 0 | 0 | 0 NA |
| Clark County WA_PH                    | clarkcowa_ph    | Local   | 1 | 0 | 0 | 0 | 0 NA |
| Clay Co. Pub. Health                  | claycountymn    | Local   | 1 | 0 | 0 | 0 | 0 NA |
| Clay Co Health Dept Verified account  | claymohealth    | Local   | 1 | 0 | 0 | 0 | 0 NA |
| CDPH                                  | clcdph          | Local   | 1 | 0 | 0 | 0 | 0 NA |
| ClintonCoHealthDept                   | clintoncohealth | Local   | 1 | 0 | 0 | 0 | 0 NA |
| Contra Costa Health Verified account  | cocohealth      | Local   | 1 | 0 | 0 | 0 | 0 NA |
| CDPHE EPR                             | cohealth        | State   | 1 | 0 | 0 | 0 | 0 NA |
| Columbus Health                       | columbushealth  | Local   | 1 | 0 | 0 | 0 | 0 NA |
| Columbia/BooneHealth                  | como_healthdept | Local   | 1 | 0 | 0 | 0 | 0 NA |
| CCDPH                                 | cookcohealth    | Local   | 1 | 0 | 0 | 0 | 0 NA |
| Champaign Health                      | cpublichealth   | Local   | 1 | 0 | 0 | 0 | 0 NA |
| CU Public Health                      | cpublichealth   | Local   | 1 | 0 | 0 | 0 | 0 NA |
| CraterHealthDistrict                  | craterhd        | Local   | 1 | 0 | 0 | 0 | 0 NA |
| GenRacineCoHealth                     | crchd           | Local   | 1 | 0 | 0 | 0 | 0 NA |
| CT Public Health                      | ctdph           | State   | 1 | 0 | 0 | 0 | 0 NA |
| CU Public Health                      | cu_publichealth | Local   | 1 | 0 | 0 | 0 | 0 NA |
| CUPHD                                 | cuphd           | Local   | 1 | 0 | 0 | 0 | 0 NA |
| Darke County Health                   | darkecohealth   | Local   | 1 | 0 | 0 | 0 | 0 NA |
| Davis County Health                   | daviscountyhlth | Local   | 1 | 0 | 0 | 0 | 0 NA |
| Defiance Co. Health                   | dcghd           | Local   | 1 | 0 | 0 | 0 | 0 NA |
| Del.Co Public Health                  | dcphs           | Local   | 1 | 0 | 0 | 0 | 0 NA |
|                                       | debhourycdc     | Federal | 1 | 0 | 0 | 0 | 0 NA |
| DHSS                                  | delaware_dhss   | State   | 1 | 0 | 0 | 0 | 0 NA |
| Delaware Health Dist                  | delawarehealth  | Local   | 1 | 0 | 0 | 0 | 0 NA |
| Denver Public Health                  | denpublichealth | Local   | 1 | 0 | 0 | 0 | 0 NA |
| Detroit Health Dept                   | dethealth       | Local   | 1 | 0 | 0 | 0 | 0 NA |
| WIDeptHealthServices                  | dhswh           | State   | 1 | 0 | 0 | 0 | 0 NA |
|                                       | drkhabbazcdc    | Federal | 1 | 0 | 0 | 0 | 0 NA |
|                                       | drmartincdc     | Federal | 1 | 0 | 0 | 0 | 0 NA |
|                                       | drmermincdc     | Federal | 1 | 0 | 0 | 0 | 0 NA |
| DCHD                                  | dupagehd        | Local   | 1 | 0 | 0 | 0 | 0 NA |
| Durham Health                         | durhamhealth    | Local   | 1 | 0 | 0 | 0 | 0 NA |
| Durham Public Health                  | durhamhealthnc  | Local   | 1 | 0 | 0 | 0 | 0 NA |
| ECPHD                                 | eastcentralph   | Local   | 1 | 0 | 0 | 0 | 0 NA |
| Erie Cty Health Dept                  | ecdoh           | Local   | 1 | 0 | 0 | 0 | 0 NA |
| EnglewoodHealthDept                   | englewoodhealth | Local   | 1 | 0 | 0 | 0 | 0 NA |
| Public Health                         | epcpublichealth | Local   | 1 | 0 | 0 | 0 | 0 NA |
| EP Public Health                      | eppublichealth  | Local   | 1 | 0 | 0 | 0 | 0 NA |
| FairfaxCounty Health Verified account | fairfaxhealth   | Local   | 1 | 0 | 0 | 0 | 0 NA |
| Franklin County PH                    | fc_publichealth | Local   | 1 | 0 | 0 | 0 | 0 NA |
| FC Health Department                  | fchealthdept    | Local   | 1 | 0 | 0 | 0 | 0 NA |
| FCPublicHealth                        | fcph            | Local   | 1 | 0 | 0 | 0 | 0 NA |
| FDA Drug Information Verified account | fda_drug_info   | Federal | 1 | 0 | 0 | 0 | 0 NA |
| U.S. FDA Verified account             | fdarecalls      | Federal | 1 | 0 | 0 | 0 | 0 NA |
| FDA Tobacco Verified account          | fdatobacco      | Federal | 1 | 0 | 0 | 0 | 0 NA |
| FEMA Verified account                 | fema            | Federal | 1 | 0 | 0 | 0 | 0 NA |
| Broward Health Dept                   | flhealthbroward | Local   | 1 | 0 | 0 | 0 | 0 NA |
| FSRIO at NAL Verified account         | foodsafety      | Federal | 1 | 0 | 0 | 0 | 0 NA |
| foodsafety.gov Verified account       | foodsafetygov   | Federal | 1 | 0 | 0 | 0 | 0 NA |
| Health & Human Ser.                   | fortbendhealth  | Local   | 1 | 0 | 0 | 0 | 0 NA |
| Fulton Health                         | fultonhealth    | Local   | 1 | 0 | 0 | 0 | 0 NA |
| Gallatin Health Dept                  | gallatinhealth  | Local   | 1 | 0 | 0 | 0 | 0 NA |
| Gaston HHS                            | gastonhhs       | Local   | 1 | 0 | 0 | 0 | 0 NA |
| GF Public Health                      | gfpublichealth  | Local   | 1 | 0 | 0 | 0 | 0 NA |
| GNRHealthDepartments                  | gnrhealth       | Local   | 1 | 0 | 0 | 0 | 0 NA |
| Geauga County LHD                     | gphohio         | Local   | 1 | 0 | 0 | 0 | 0 NA |
| Green River Health                    | grdhd           | Local   | 1 | 0 | 0 | 0 | 0 NA |
| GreendaleHD                           | greendalehd     | Local   | 1 | 0 | 0 | 0 | 0 NA |
| GC Public Health                      | greenecoph      | Local   | 1 | 0 | 0 | 0 | 0 NA |
| Greene NY Health                      | greenenyhealth  | Local   | 1 | 0 | 0 | 0 | 0 NA |
| Greenup Co Health                     | greenuphealth   | Local   | 1 | 0 | 0 | 0 | 0 NA |
| Grinnell Regional                     | grmc            | Local   | 1 | 0 | 0 | 0 | 0 NA |
| GTCounty Health Dept                  | gtchd           | Local   | 1 | 0 | 0 | 0 | 0 NA |
| Hamilton Co. Health                   | hamcohealth     | Local   | 1 | 0 | 0 | 0 | 0 NA |
| ChattHamiltonHealth                   | hamiltonhealth  | Local   | 1 | 0 | 0 | 0 | 0 NA |
| HarCo Health Dept.                    | harcohealthdept | Local   | 1 | 0 | 0 | 0 | 0 NA |
| Hartford HHS                          | hartfordhealth  | Local   | 1 | 0 | 0 | 0 | 0 NA |
| HCHPH                                 | hchph           | Local   | 1 | 0 | 0 | 0 | 0 NA |
| Health District                       | healthdistrict  | Local   | 1 | 0 | 0 | 0 | 0 NA |
| DOUGLASCOUNTYHEALTH                   | healthdouglasco | Local   | 1 | 0 | 0 | 0 | 0 NA |
| NYSDOH Verified account               | healthnygov     | State   | 1 | 0 | 0 | 0 | 0 NA |
| VT Dept of Health                     | healthvermont   | State   | 1 | 0 | 0 | 0 | 0 NA |
| Wayne County Health                   | healthwayne     | Local   | 1 | 0 | 0 | 0 | 0 NA |
| Williams Co. Health                   | healthwchd      | Local   | 1 | 0 | 0 | 0 | 0 NA |

|                                       |                 |         |   |   |   |   |      |
|---------------------------------------|-----------------|---------|---|---|---|---|------|
| Boston Public Health                  | healthyboston   | Local   | 1 | 0 | 0 | 0 | 0 NA |
| DeKalb County BOH                     | healthydekalb   | Local   | 1 | 0 | 0 | 0 | 0 NA |
| Florida Dept. Health                  | healthyfla      | State   | 1 | 0 | 0 | 0 | 0 NA |
| Hull Board of Health                  | healthyhull     | Local   | 1 | 0 | 0 | 0 | 0 NA |
| Mo Health & Sr Svcs Verified account  | healthylivingmo | State   | 1 | 0 | 0 | 0 | 0 NA |
| Mason County Health                   | healthymc       | Local   | 1 | 0 | 0 | 0 | 0 NA |
| OK Dept of Health                     | healthyoklahoma | State   | 1 | 0 | 0 | 0 | 0 NA |
| HendricksHealthDept                   | hendricks_co    | Local   | 1 | 0 | 0 | 0 | 0 NA |
| Henry County HD                       | henrycountyhd   | Local   | 1 | 0 | 0 | 0 | 0 NA |
| HHS.gov Verified account              | hhsgov          | Federal | 1 | 0 | 0 | 0 | 0 NA |
| Hidalgo Co. Health                    | hidalgohealth   | Local   | 1 | 0 | 0 | 0 | 0 NA |
| HI Dept of Health                     | higov_health    | State   | 1 | 0 | 0 | 0 | 0 NA |
| AIDS.gov Verified account             | hivgov          | Federal | 1 | 0 | 0 | 0 | 0 NA |
| Howard Co Health Dep                  | hocohealth      | Local   | 1 | 0 | 0 | 0 | 0 NA |
| Verified account                      | hocohealth      | Local   | 1 | 0 | 0 | 0 | 0 NA |
| Houston Health Dept                   | houstonhealth   | Local   | 1 | 0 | 0 | 0 | 0 NA |
| Humboldt County DHHS                  | humcodhhs       | Local   | 1 | 0 | 0 | 0 | 0 NA |
| Verified account                      | humcodhhs       | Local   | 1 | 0 | 0 | 0 | 0 NA |
| HCPH                                  | huroncohealth   | Local   | 1 | 0 | 0 | 0 | 0 NA |
| IDPH - Public Health                  | iapublichealth  | State   | 1 | 0 | 0 | 0 | 0 NA |
| ICPHD                                 | icpublichealth  | Local   | 1 | 0 | 0 | 0 | 0 NA |
| IDHW                                  | idhw            | State   | 1 | 0 | 0 | 0 | 0 NA |
| IDPH                                  | idph            | State   | 1 | 0 | 0 | 0 | 0 NA |
| IDPH-OPR                              | idph            | State   | 1 | 0 | 0 | 0 | 0 NA |
| Mobile County Health                  | ilovemchd       | Local   | 1 | 0 | 0 | 0 | 0 NA |
| Ingham Health Dept.                   | inghamhealth    | Local   | 1 | 0 | 0 | 0 | 0 NA |
| OWH                                   | inwomenshealth  | State   | 1 | 0 | 0 | 0 | 0 NA |
| JessCo Health Dept.                   | jchd_ky         | Local   | 1 | 0 | 0 | 0 | 0 NA |
| JCPHS                                 | jcphs           | Local   | 1 | 0 | 0 | 0 | 0 NA |
| JeffCoHealth                          | jeffcohealthmo  | Local   | 1 | 0 | 0 | 0 | 0 NA |
| Jeffco Public Health Verified account | jeffcoph        | Local   | 1 | 0 | 0 | 0 | 0 NA |
| JCDHE Verified account                | jocohealth      | Local   | 1 | 0 | 0 | 0 | 0 NA |
| JoCo Public Health                    | jocoph          | Local   | 1 | 0 | 0 | 0 | 0 NA |
| Kane County Health                    | kanecohealth    | Local   | 1 | 0 | 0 | 0 | 0 NA |
| KCMO Health Dept                      | kcmohealthdept  | Local   | 1 | 0 | 0 | 0 | 0 NA |
| Public Health - SKC                   | kcpubhealth     | Local   | 1 | 0 | 0 | 0 | 0 NA |
| KDHE                                  | kdhe            | State   | 1 | 0 | 0 | 0 | 0 NA |
| Knox Co Health Dept                   | knoxcohealthtn  | Local   | 1 | 0 | 0 | 0 | 0 NA |
| Knox County Health                    | knoxhealth      | Local   | 1 | 0 | 0 | 0 | 0 NA |
| Ky. Public Health                     | kyhealthalerts  | State   | 1 | 0 | 0 | 0 | 0 NA |
| La Dept. of Health                    | ladephealth     | State   | 1 | 0 | 0 | 0 | 0 NA |
| Lake Co. Health Dept                  | lakecohealth    | Local   | 1 | 0 | 0 | 0 | 0 NA |
| LA Public Health                      | lapublichealth  | Local   | 1 | 0 | 0 | 0 | 0 NA |
| Larimer Health Dept.                  | larimerhealth   | Local   | 1 | 0 | 0 | 0 | 0 NA |
| Long Beach Health                     | lbhealthdept    | Local   | 1 | 0 | 0 | 0 | 0 NA |
| Health Department                     | lchdhd          | Local   | 1 | 0 | 0 | 0 | 0 NA |
| LCHC                                  | lchcia          | Local   | 1 | 0 | 0 | 0 | 0 NA |
| Lake Cty Health Dist                  | lchealthdist    | Local   | 1 | 0 | 0 | 0 | 0 NA |
| Linn Public Health                    | lcpublichealth  | Local   | 1 | 0 | 0 | 0 | 0 NA |
| LDCHealth                             | ldchealth       | Local   | 1 | 0 | 0 | 0 | 0 NA |
| Ledge Light HD                        | ledgelighthd    | Local   | 1 | 0 | 0 | 0 | 0 NA |
| Lenawee Health Dept.                  | lenaweehd       | Local   | 1 | 0 | 0 | 0 | 0 NA |
| LexKy Health Dept.                    | lfchd           | Local   | 1 | 0 | 0 | 0 | 0 NA |
| Licking Co. Health                    | lickinghealth   | Local   | 1 | 0 | 0 | 0 | 0 NA |
| Lorain County Health                  | loraincohealth  | Local   | 1 | 0 | 0 | 0 | 0 NA |
| LouMetroHealth                        | loumetrohealth  | Local   | 1 | 0 | 0 | 0 | 0 NA |
| Macoupin County PHD                   | macoupinhealth  | Local   | 1 | 0 | 0 | 0 | 0 NA |
| MadisonCountyHealth                   | madisonchd      | Local   | 1 | 0 | 0 | 0 | 0 NA |
| Madison Co HD, KY                     | madisoncountyhd | Local   | 1 | 0 | 0 | 0 | 0 NA |
| Public Health                         | maricopahealth  | Local   | 1 | 0 | 0 | 0 | 0 NA |
| Public Health                         | maricopahealth  | Local   | 1 | 0 | 0 | 0 | 0 NA |
| MarinHealth&HumanSvc                  | marinhhs        | Local   | 1 | 0 | 0 | 0 | 0 NA |
| Verified account                      | marinhhs        | Local   | 1 | 0 | 0 | 0 | 0 NA |
| Marion Co. Health                     | marion_health   | Local   | 1 | 0 | 0 | 0 | 0 NA |
| Marion County Health                  | marionco_health | Local   | 1 | 0 | 0 | 0 | 0 NA |
| Mass. Public Health                   | massdph         | State   | 1 | 0 | 0 | 0 | 0 NA |
| Healthy Mesa County                   | mc_publichealth | Local   | 1 | 0 | 0 | 0 | 0 NA |
| MCHD & Public Health                  | mchd_tx         | Local   | 1 | 0 | 0 | 0 | 0 NA |
| Monterey Co Health                    | mchdpio         | Local   | 1 | 0 | 0 | 0 | 0 NA |
| McHenryCountyHealth                   | mchenrycohealth | Local   | 1 | 0 | 0 | 0 | 0 NA |
| McLeanCountyHealth                    | mcleanhealth    | Local   | 1 | 0 | 0 | 0 | 0 NA |
| DHMH Verified account                 | mdhealthdept    | State   | 1 | 0 | 0 | 0 | 0 NA |
| Health Department                     | meckcounty      | Local   | 1 | 0 | 0 | 0 | 0 NA |
| Health Department                     | meckcounty      | Local   | 1 | 0 | 0 | 0 | 0 NA |
| Medina County Health                  | medinahealth    | Local   | 1 | 0 | 0 | 0 | 0 NA |
| Maine CDC                             | mepublichealth  | State   | 1 | 0 | 0 | 0 | 0 NA |
| Miami County Health                   | miamicountyph   | Local   | 1 | 0 | 0 | 0 | 0 NA |
| Michigan HHS Dept Verified account    | michiganhhs     | State   | 1 | 0 | 0 | 0 | 0 NA |
| millionheartsus                       | millionheartsus | Federal | 1 | 0 | 0 | 0 | 0 NA |
| Milton BOH                            | miltonboh       | Local   | 1 | 0 | 0 | 0 | 0 NA |
| Ottawa County Health                  | miocdph         | Local   | 1 | 0 | 0 | 0 | 0 NA |
| MKE Health Dept.                      | mkehealth       | Local   | 1 | 0 | 0 | 0 | 0 NA |
| MDH                                   | mnhealth        | State   | 1 | 0 | 0 | 0 | 0 NA |
| Montgomery CountyHHS                  | mocodhhs        | Local   | 1 | 0 | 0 | 0 | 0 NA |
| Monroe County Health                  | monroecountyhea | Local   | 1 | 0 | 0 | 0 | 0 NA |

|                                       |                 |         |   |   |   |   |      |
|---------------------------------------|-----------------|---------|---|---|---|---|------|
| Monroe County Health                  | monroehealth    | Local   | 1 | 0 | 0 | 0 | 0 NA |
| MS Dept of Health                     | msdh            | State   | 1 | 0 | 0 | 0 | 0 NA |
| Missoula Health Dept                  | mslahealthdept  | Local   | 1 | 0 | 0 | 0 | 0 NA |
| MultCoHealth                          | multcohealth    | Local   | 1 | 0 | 0 | 0 | 0 NA |
| NashvilleHealth                       | nashvillehealth | Local   | 1 | 0 | 0 | 0 | 0 NA |
| NC DHHS Verified account              | ncdhhs          | State   | 1 | 0 | 0 | 0 | 0 NA |
| N.CentralHealthDist.                  | nchd52          | Local   | 1 | 0 | 0 | 0 | 0 NA |
|                                       | nchstats        | Federal | 1 | 0 | 0 | 0 | 0 NA |
| NC DPH                                | ncpublichealth  | State   | 1 | 0 | 0 | 0 | 0 NA |
| N.D. Dept. of Health                  | nddoh           | State   | 1 | 0 | 0 | 0 | 0 NA |
| Nebraska DHHS                         | nedhhs          | State   | 1 | 0 | 0 | 0 | 0 NA |
| Needham PublicHealth                  | needham_health  | Local   | 1 | 0 | 0 | 0 | 0 NA |
| NET Health                            | nethealthfits   | Local   | 1 | 0 | 0 | 0 | 0 NA |
| Newton Health & HS                    | newtonhealth    | Local   | 1 | 0 | 0 | 0 | 0 NA |
| North Georgia Health                  | ngahealthdist   | Local   | 1 | 0 | 0 | 0 | 0 NA |
| DHHS PIO                              | nhdhhspio       | State   | 1 | 0 | 0 | 0 | 0 NA |
| NewHaven Health Dept                  | nhpublichealth  | Local   | 1 | 0 | 0 | 0 | 0 NA |
| NIH Verified account                  | nih             | Federal | 1 | 0 | 0 | 0 | 0 NA |
| NIH NHLBI Verified account            | nih_nhlbi       | Federal | 1 | 0 | 0 | 0 | 0 NA |
| Mental Health NIMH Verified account   | nimhgov         | Federal | 1 | 0 | 0 | 0 | 0 NA |
| NIOSH Verified account                | niosh           | Federal | 1 | 0 | 0 | 0 | 0 NA |
|                                       | niosh_twh       | Federal | 1 | 0 | 0 | 0 | 0 NA |
|                                       | nioshconstruct  | Federal | 1 | 0 | 0 | 0 | 0 NA |
|                                       | nioshespanol    | Federal | 1 | 0 | 0 | 0 | 0 NA |
|                                       | nioshface       | Federal | 1 | 0 | 0 | 0 | 0 NA |
|                                       | nioshmining     | Federal | 1 | 0 | 0 | 0 | 0 NA |
|                                       | nioshnoise      | Federal | 1 | 0 | 0 | 0 | 0 NA |
| NJDOH                                 | njdeptohealth   | State   | 1 | 0 | 0 | 0 | 0 NA |
| NKY Health Dept                       | nkyhealth       | Local   | 1 | 0 | 0 | 0 | 0 NA |
| NM Dept. of Health                    | nmdoh           | State   | 1 | 0 | 0 | 0 | 0 NA |
| Northeast CO Health                   | northeasthealth | Local   | 1 | 0 | 0 | 0 | 0 NA |
| Norwalk Health Dept.                  | norwalkhealth   | Local   | 1 | 0 | 0 | 0 | 0 NA |
| Norwood Health Dept                   | norwoodhd       | Local   | 1 | 0 | 0 | 0 | 0 NA |
|                                       | niosh_npptl     | Federal | 1 | 0 | 0 | 0 | 0 NA |
| NWCOVNA                               | nwcolohealth    | Local   | 1 | 0 | 0 | 0 | 0 NA |
| nwhealth.org                          | nwhealthorg     | Local   | 1 | 0 | 0 | 0 | 0 NA |
| Oak Creek Health                      | oakcreekhealth  | Local   | 1 | 0 | 0 | 0 | 0 NA |
| Health Care Agency                    | ochealth        | Local   | 1 | 0 | 0 | 0 | 0 NA |
| Onslow County Health                  | ochealthdept    | Local   | 1 | 0 | 0 | 0 | 0 NA |
| Health Department                     | ocpublichealth  | Local   | 1 | 0 | 0 | 0 | 0 NA |
| OR Health Authority                   | ohaoregon       | State   | 1 | 0 | 0 | 0 | 0 NA |
| Ohio Dept of Health                   | ohdeptofhealth  | State   | 1 | 0 | 0 | 0 | 0 NA |
| OCCHD                                 | okchealth       | Local   | 1 | 0 | 0 | 0 | 0 NA |
| Orange County Health                  | orangehealthnc  | Local   | 1 | 0 | 0 | 0 | 0 NA |
| St. Mary's Health                     | oswegohealth    | Local   | 1 | 0 | 0 | 0 | 0 NA |
| Pennsylvania DOH Verified account     | pahealthdept    | State   | 1 | 0 | 0 | 0 | 0 NA |
| Pima County Health                    | pchd            | Local   | 1 | 0 | 0 | 0 | 0 NA |
| Peoria Hlth Dept IL                   | peoriaprepare   | Local   | 1 | 0 | 0 | 0 | 0 NA |
| PequannockTwp HD Gov                  | peqtwp_health   | Local   | 1 | 0 | 0 | 0 | 0 NA |
| PGC Health Dept.                      | pgchealth       | Local   | 1 | 0 | 0 | 0 | 0 NA |
| Panhandle Health Verified account     | phdidaho        | Local   | 1 | 0 | 0 | 0 | 0 NA |
| Idaho Health Dist. 2                  | phincd          | Local   | 1 | 0 | 0 | 0 | 0 NA |
| Idaho Health Dist. 2                  | phincd          | Local   | 1 | 0 | 0 | 0 | 0 NA |
| Philly Public Health Verified account | phlpublichealth | Local   | 1 | 0 | 0 | 0 | 0 NA |
| PHS District Health                   | phshealthdept   | Local   | 1 | 0 | 0 | 0 | 0 NA |
| PikeCountyHealthDep                   | pikecountyhd    | Local   | 1 | 0 | 0 | 0 | 0 NA |
| Platte County Health                  | plattehealth    | Local   | 1 | 0 | 0 | 0 | 0 NA |
| Polk County Health                    | polkcohealth    | Local   | 1 | 0 | 0 | 0 | 0 NA |
| Polk Co Health Ctr                    | polkcountyhc    | Local   | 1 | 0 | 0 | 0 | 0 NA |
| Preble County Health                  | preblecohealth  | Local   | 1 | 0 | 0 | 0 | 0 NA |
| PCCHU Health Unit                     | ptbohealth      | Local   | 1 | 0 | 0 | 0 | 0 NA |
| Barron Public Health                  | publichealthbc  | Local   | 1 | 0 | 0 | 0 | 0 NA |
| Public Health DMC                     | publichealthdmc | Local   | 1 | 0 | 0 | 0 | 0 NA |
| publichealthOC                        | publichealthoc  | Local   | 1 | 0 | 0 | 0 | 0 NA |
| PuebloHealthDept                      | pueblohealth    | Local   | 1 | 0 | 0 | 0 | 0 NA |
| Putnam County Health                  | putnamcohealth  | Local   | 1 | 0 | 0 | 0 | 0 NA |
| PutnamHealthDeptNY                    | putnamhealthny  | Local   | 1 | 0 | 0 | 0 | 0 NA |
| Readygov Verified account             | readygov        | Federal | 1 | 0 | 0 | 0 | 0 NA |
| Richland Health                       | richlandhealth1 | Local   | 1 | 0 | 0 | 0 | 0 NA |
| RI Dept. of Health                    | rihealth        | State   | 1 | 0 | 0 | 0 | 0 NA |
| Rockland County DOH                   | rockhealth      | Local   | 1 | 0 | 0 | 0 | 0 NA |
| Ross County Health                    | rosscohealth    | Local   | 1 | 0 | 0 | 0 | 0 NA |
| Sac County DHHS                       | sacpublichealth | Local   | 1 | 0 | 0 | 0 | 0 NA |
| Sac County DHHS                       | sacpublichealth | Local   | 1 | 0 | 0 | 0 | 0 NA |
| Salem BoardOfHealth                   | salemhealthdept | Local   | 1 | 0 | 0 | 0 | 0 NA |
| Salt Lake Co. Health Verified account | saltlakehealth  | Local   | 1 | 0 | 0 | 0 | 0 NA |
| SA Metro Health                       | sametrohealth   | Local   | 1 | 0 | 0 | 0 | 0 NA |
| SAMHSA Verified account               | samhsagov       | Federal | 1 | 0 | 0 | 0 | 0 NA |
| Sandusky County HD                    | sanduskycohd    | Local   | 1 | 0 | 0 | 0 | 0 NA |
| Sauk Co Health Dept                   | saukcohealth    | Local   | 1 | 0 | 0 | 0 | 0 NA |
| SBC Public Health                     | sbcpublichealth | Local   | 1 | 0 | 0 | 0 | 0 NA |

|                               |                 |            |   |   |   |   |      |
|-------------------------------|-----------------|------------|---|---|---|---|------|
| St Charles Co Health          | scchealth       | Local      | 1 | 0 | 0 | 0 | 0 NA |
| St.Croix Pub Health           | sccwiess        | Local      | 1 | 0 | 0 | 0 | 0 NA |
| SCDHEC                        | scdhec          | State      | 1 | 0 | 0 | 0 | 0 NA |
| South Central Health          | schd_5_1        | Local      | 1 | 0 | 0 | 0 | 0 NA |
| SC Dept of Health             | schealthdept    | Local      | 1 | 0 | 0 | 0 | 0 NA |
| SchuylerPublicHealth          | schuylercoph    | Local      | 1 | 0 | 0 | 0 | 0 NA |
| SummitCoPublicHealth          | scphoh          | Local      | 1 | 0 | 0 | 0 | 0 NA |
| SD HHSa Verified account      | sdcountyhhsa    | Local      | 1 | 0 | 0 | 0 | 0 NA |
| Department of Health          |                 |            |   |   |   |   |      |
| Verified account              | sddoh           | State      | 1 | 0 | 0 | 0 | 0 NA |
| SEU Health District           | seuthhealth     | Local      | 1 | 0 | 0 | 0 | 0 NA |
| SFDPH                         | sf_dph          | Local      | 1 | 0 | 0 | 0 | 0 NA |
| S-GC Health Dept.             | sgchd           | Local      | 1 | 0 | 0 | 0 | 0 NA |
| Shelby County Health          |                 |            |   |   |   |   |      |
| Verified account              | shelbytnhealth  | Local      | 1 | 0 | 0 | 0 | 0 NA |
| SIPH                          | siphidaho       | Local      | 1 | 0 | 0 | 0 | 0 NA |
| SLO Public Health Verified    |                 |            |   |   |   |   |      |
| account                       | slopublichealth | Local      | 1 | 0 | 0 | 0 | 0 NA |
| St. Mary's Health             | smchd_gov       | Local      | 1 | 0 | 0 | 0 | 0 NA |
| SMC Health System             | smchealth       | Local      | 1 | 0 | 0 | 0 | 0 NA |
| SMDHU                         | smdhealthunit   | Local      | 1 | 0 | 0 | 0 | 0 NA |
| SN Health District            | snhdflu         | Local      | 1 | 0 | 0 | 0 | 0 NA |
| SN Health District Verified   |                 |            |   |   |   |   |      |
| account                       | snhdinfo        | Local      | 1 | 0 | 0 | 0 | 0 NA |
| SnoHD                         | snohd           | Local      | 1 | 0 | 0 | 0 | 0 NA |
| SE Health District            | southhealthdist | Local      | 1 | 0 | 0 | 0 | 0 NA |
| SRHD                          | spokanehealth   | Local      | 1 | 0 | 0 | 0 | 0 NA |
| Indiana Health Dept           | statehealthin   | State      | 1 | 0 | 0 | 0 | 0 NA |
| StClairCounty Health          | stclairhealth   | Local      | 1 | 0 | 0 | 0 | 0 NA |
| St. Louis County DPH          | stlcountydoh    | Local      | 1 | 0 | 0 | 0 | 0 NA |
| StoneCountyHealthDp           | stonecohealth   | Local      | 1 | 0 | 0 | 0 | 0 NA |
| Sullivan Co. Health           | sullivanhealth  | Local      | 1 | 0 | 0 | 0 | 0 NA |
| SW Public Health Dep          | swpublichealth  | Local      | 1 | 0 | 0 | 0 | 0 NA |
| Taney Co Health Dept          | taneycohealth   | Local      | 1 | 0 | 0 | 0 | 0 NA |
| TCHD Emergency Verified       |                 |            |   |   |   |   |      |
| account                       | tchdhealth      | Local      | 1 | 0 | 0 | 0 | 0 NA |
| Tri-County Health Verified    |                 |            |   |   |   |   |      |
| account                       | tchdhealth      | Local      | 1 | 0 | 0 | 0 | 0 NA |
| Texas DSHS                    | texasdshs       | State      | 1 | 0 | 0 | 0 | 0 NA |
| ThurstonHealth                | thurstonhealth  | Local      | 1 | 0 | 0 | 0 | 0 NA |
| TN Dept. of Health            | tndeptofhealth  | State      | 1 | 0 | 0 | 0 | 0 NA |
| Toledo Lucas                  | toledolucashd   | Local      | 1 | 0 | 0 | 0 | 0 NA |
| TooeleCoHealthDept            | tooelehealth    | Local      | 1 | 0 | 0 | 0 | 0 NA |
| Amherst Health Dept           | townofamherst   | Local      | 1 | 0 | 0 | 0 | 0 NA |
| Concord MA Pub Hlth           | townofconcordma | Local      | 1 | 0 | 0 | 0 | 0 NA |
| Pierce County Health          | tpchd           | Local      | 1 | 0 | 0 | 0 | 0 NA |
| 3 Rivers Health Dept          | trhd            | Local      | 1 | 0 | 0 | 0 | 0 NA |
| TulareCo HHSa                 | tulareco_hhsa   | Local      | 1 | 0 | 0 | 0 | 0 NA |
| Tulsa Health Dept             | tulsahealthdept | Local      | 1 | 0 | 0 | 0 | 0 NA |
| TuSNHD                        | tusnhd          | Local      | 1 | 0 | 0 | 0 | 0 NA |
| UtahCountyHealthDept          | uchd            | Local      | 1 | 0 | 0 | 0 | 0 NA |
| Patrick McCormack             | uncashealth     | Local      | 1 | 0 | 0 | 0 | 0 NA |
| Dept. of Agriculture Verified |                 |            |   |   |   |   |      |
| account                       | usda            | Federal    | 1 | 0 | 0 | 0 | 0 NA |
| Utah Dept. of Health Verified |                 |            |   |   |   |   |      |
| account                       | utahdepofhealth | State      | 1 | 0 | 0 | 0 | 0 NA |
| Health Care Agency            | vcpublichealth  | Local      | 1 | 0 | 0 | 0 | 0 NA |
| Va Dept of Health             | vdhgov          | State      | 1 | 0 | 0 | 0 | 0 NA |
| VintonCo Health Dept          | vintoncohd      | Local      | 1 | 0 | 0 | 0 | 0 NA |
| Vineland Health Dept          | vidhealth       | Local      | 1 | 0 | 0 | 0 | 0 NA |
| WacoMc Public Health          | wacohealthdept  | Local      | 1 | 0 | 0 | 0 | 0 NA |
| WA Dept. of Health            | wadepthhealth   | State      | 1 | 0 | 0 | 0 | 0 NA |
| WCCHD                         | warrencohealth  | Local      | 1 | 0 | 0 | 0 | 0 NA |
| Wasatch County HD             | wasatchcountyhd | Local      | 1 | 0 | 0 | 0 | 0 NA |
| MontereyCoPubHealth           | washcoverstay   | Local      | 1 | 0 | 0 | 0 | 0 NA |
| Wash. Co. HD of Ohio          | washingtoncooh  | Local      | 1 | 0 | 0 | 0 | 0 NA |
| Washoe County Health          | washoehealth    | Local      | 1 | 0 | 0 | 0 | 0 NA |
| OZ Public Health              | washozph        | Local      | 1 | 0 | 0 | 0 | 0 NA |
| WCCHealth District            | wcchd           | Local      | 1 | 0 | 0 | 0 | 0 NA |
| Wood County Health            | wchdohio        | Local      | 1 | 0 | 0 | 0 | 0 NA |
| Warren County Health          | wchealth        | Local      | 1 | 0 | 0 | 0 | 0 NA |
| Westchester Health            | wchealthdept    | Local      | 1 | 0 | 0 | 0 | 0 NA |
| WC Public Health              | wcpublichealth  | Local      | 1 | 0 | 0 | 0 | 0 NA |
| Weber-Morgan Health           | webermorganhd   | Local      | 1 | 0 | 0 | 0 | 0 NA |
| Webster Co. Health            | websterpublic   | Local      | 1 | 0 | 0 | 0 | 0 NA |
| WhatcomCountyHealth           | whatcomcohealth | Local      | 1 | 0 | 0 | 0 | 0 NA |
| World Health Organization     | who             | Internatio | 1 | 0 | 0 | 0 | 0 NA |
| Wicomico Health               | wicomicohealth  | Local      | 1 | 0 | 0 | 0 | 0 NA |
| Will County Health            | willcohealth    | Local      | 1 | 0 | 0 | 0 | 0 NA |
| WCCHHealth District           | williamsonntn   | Local      | 1 | 0 | 0 | 0 | 0 NA |
| WinnCoHealth                  | winncohealth    | Local      | 1 | 0 | 0 | 0 | 0 NA |
| Winnebago Co Health           | winnebagohealth | Local      | 1 | 0 | 0 | 0 | 0 NA |
| Winona Health                 | winonahealth    | Local      | 1 | 0 | 0 | 0 | 0 NA |
| Western NSW LHD               | wnswlhd         | Local      | 1 | 0 | 0 | 0 | 0 NA |
| WDPH                          | worcesterdph    | Local      | 1 | 0 | 0 | 0 | 0 NA |
| Worcester Health              | worcesterhealth | Local      | 1 | 0 | 0 | 0 | 0 NA |

|                      |                 |                |          |          |   |   |   |      |
|----------------------|-----------------|----------------|----------|----------|---|---|---|------|
| Wright County PH     | wrightcountymn  |                | Local    | 1        | 0 | 0 | 0 | 0 NA |
| W.Springfield Health | wspfdhealthdept |                | Local    | 1        | 0 | 0 | 0 | 0 NA |
| WV DHHR              | wv_dhhr         |                | State    | 1        | 0 | 0 | 0 | 0 NA |
| WW Community Health  | wccdch          |                | Local    | 1        | 0 | 0 | 0 | 0 NA |
| Yakima Health Dist.  | yakimahealth    |                | Local    | 1        | 0 | 0 | 0 | 0 NA |
| Alabama              | alabamaema      | Alabama        | Local    | 0        | 1 | 0 | 0 | 0 NA |
| Alaska               | alaskadhsem     | Alaska         | Local    | 0        | 1 | 0 | 0 | 0 NA |
| Arizona              | aznationalguard | Arizona        | Local    | 0        | 1 | 0 | 0 | 0 NA |
| Arkansas             | ar_emergencies  | Arkansas       | Local    | 0        | 1 | 0 | 0 | 0 NA |
| California           | cal_oes         | California     | Local    | 0        | 1 | 0 | 0 | 0 NA |
| Colorado             | coemergency     | Colorado       | Local    | 0        | 1 | 0 | 0 | 0 NA |
| Connecticut          | ctdemhs         | Connecticut    | Local    | 0        | 1 | 0 | 0 | 0 NA |
| Delaware             | delawareema     | Delaware       | Local    | 0        | 1 | 0 | 0 | 0 NA |
| Florida              | flsert          | Florida        | Local    | 0        | 1 | 0 | 0 | 0 NA |
| Georgia              | georgiaema      | Georgia        | Local    | 0        | 1 | 0 | 0 | 0 NA |
| Hawaii               | hawaii_ema      | Hawaii         | Local    | 0        | 1 | 0 | 0 | 0 NA |
| Idaho                | idahooem        | Idaho          | Local    | 0        | 1 | 0 | 0 | 0 NA |
| Illinois             | readyillinois   | Illinois       | Local    | 0        | 1 | 0 | 0 | 0 NA |
| Indiana              | idhs            | Indiana        | Local    | 0        | 1 | 0 | 0 | 0 NA |
| Iowa                 | iowahsem        | Iowa           | Local    | 0        | 1 | 0 | 0 | 0 NA |
| Kansas               | kansasemergency | Kansas         | Local    | 0        | 1 | 0 | 0 | 0 NA |
| Kentucky             | kentuckyem      | Kentucky       | Local    | 0        | 1 | 0 | 0 | 0 NA |
| Louisiana            | gohsep          | Louisiana      | Local    | 0        | 1 | 0 | 0 | 0 NA |
| Maine                | maineema        | Maine          | Local    | 0        | 1 | 0 | 0 | 0 NA |
| Maryland             | mdmema          | Maryland       | Local    | 0        | 1 | 0 | 0 | 0 NA |
| Massachusetts        | massema         | Massachusetts  | Local    | 0        | 1 | 0 | 0 | 0 NA |
| Michigan             | michemhs        | Michigan       | Local    | 0        | 1 | 0 | 0 | 0 NA |
| Minnesota            | mndps_hsem      | Minnesota      | Local    | 0        | 1 | 0 | 0 | 0 NA |
| Mississippi          | msema           | Mississippi    | Local    | 0        | 1 | 0 | 0 | 0 NA |
| Missouri             | mosema_         | Missouri       | Local    | 0        | 1 | 0 | 0 | 0 NA |
| Montana              | montanades      | Montana        | Local    | 0        | 1 | 0 | 0 | 0 NA |
| Nebraska             | nematweets      | Nebraska       | Local    | 0        | 1 | 0 | 0 | 0 NA |
| Nevada               | nvemergencygmt  | Nevada         | Local    | 0        | 1 | 0 | 0 | 0 NA |
| New Hampshire        | nh_hsem         | New Hampshire  | Local    | 0        | 1 | 0 | 0 | 0 NA |
| New Jersey           | njohsp          | New Jersey     | Local    | 0        | 1 | 0 | 0 | 0 NA |
| New Mexico           | nmdhsem         | New Mexico     | Local    | 0        | 1 | 0 | 0 | 0 NA |
| New York             | nysdhses        | New York       | Local    | 0        | 1 | 0 | 0 | 0 NA |
| North Carolina       | ncemergency     | North Carolina | Local    | 0        | 1 | 0 | 0 | 0 NA |
| North Dakota         | nddes           | North Dakota   | Local    | 0        | 1 | 0 | 0 | 0 NA |
| Ohio                 | ohio_ema        | Ohio           | Local    | 0        | 1 | 0 | 0 | 0 NA |
| Oklahoma             | okem            | Oklahoma       | Local    | 0        | 1 | 0 | 0 | 0 NA |
| Oregon               | oregonoem       | Oregon         | Local    | 0        | 1 | 0 | 0 | 0 NA |
| Pennsylvania         | pemahq          | Pennsylvania   | Local    | 0        | 1 | 0 | 0 | 0 NA |
| Rhode Island         | rhodeislandema  | Rhode Island   | Local    | 0        | 1 | 0 | 0 | 0 NA |
| South Carolina       | scemd           | South Carolina | Local    | 0        | 1 | 0 | 0 | 0 NA |
| South Dakota         | sdemergencygmt  | South Dakota   | Local    | 0        | 1 | 0 | 0 | 0 NA |
| Tennessee            | t_e_m_a         | Tennessee      | Local    | 0        | 1 | 0 | 0 | 0 NA |
| Texas                | t-dem           | Texas          | Local    | 0        | 1 | 0 | 0 | 0 NA |
| Utah                 | utahdps         | Utah           | Local    | 0        | 1 | 0 | 0 | 0 NA |
| Vermont              | vemvt           | Vermont        | Local    | 0        | 1 | 0 | 0 | 0 NA |
| Virginia             | v-dem           | Virginia       | Local    | 0        | 1 | 0 | 0 | 0 NA |
| Washington           | waemd           | Washington     | Local    | 0        | 1 | 0 | 0 | 0 NA |
| West Virginia        | wvdhsem         | West Virginia  | Local    | 0        | 1 | 0 | 0 | 0 NA |
| Wisconsin            | readywisconsin  | Wisconsin      | Local    | 0        | 1 | 0 | 0 | 0 NA |
| Wyoming              | wyohs           | Wyoming        | Local    | 0        | 1 | 0 | 0 | 0 NA |
| Kay Ivey             | governorkayivey | Alabama        | Governor | 0        | 0 | 1 | 0 | 0 NA |
| Mike Dunleavy        | govdunleavy     | Alaska         | Governor | 0        | 0 | 1 | 0 | 0 NA |
| Doug Ducey           | dougducey       | Arizona        | Governor | 0        | 0 | 1 | 0 | 0 NA |
| Asa Hutchinson       | asahutchinson   | Arkansas       | Governor | 0        | 0 | 1 | 0 | 0 NA |
| Gavin Newsom         | gavinnewsom     | California     | Governor | 0        | 0 | 1 | 0 | 0 NA |
| Jared Polis          | govofco         | Colorado       | Governor | 0        | 0 | 1 | 0 | 0 NA |
| Ned Lamont           | govnedlamont    | Connecticut    | Governor | 0        | 0 | 1 | 0 | 0 NA |
| John Carney          | johncarneyde    | Delaware       | Governor | 0        | 0 | 1 | 0 | 0 NA |
| Ron DeSantis         | govrondesantis  | Florida        | Governor | 0        | 0 | 1 | 0 | 0 NA |
| Brian Kemp           | govkemp         | Georgia        | Governor | 0        | 0 | 1 | 0 | 0 NA |
| Lou Leon Guerrero    | louleonguerrero | Guam           | Governor | 0        | 0 | 1 | 0 | 0 NA |
| David Ige            | govhawaii       | Hawaii         | Governor | 0        | 0 | 1 | 0 | 0 NA |
| Brad Little          | governorlittle  | Idaho          | Governor | 0        | 0 | 1 | 0 | 0 NA |
| JB Pritzker          | govpritzker     | jbpritzker     | Illinois | Governor | 0 | 0 | 1 | 0 NA |
| Eric Holcomb         | govholcomb      | Indiana        | Governor | 0        | 0 | 1 | 0 | 0 NA |
| Kim Reynolds         | iagovernor      | kimreynoldsia  | Iowa     | Governor | 0 | 0 | 1 | 0 NA |

|                        |                 |                 |                |               |          |   |   |   |   |   |         |
|------------------------|-----------------|-----------------|----------------|---------------|----------|---|---|---|---|---|---------|
| Laura Kelly            | govlaurakelly   | laurakellyks    | Kansas         |               | Governor | 0 | 0 | 1 | 0 | 0 | NA      |
| Andy Beshear           | govandybeshear  | andybeshearky   | Kentucky       |               | Governor | 0 | 0 | 1 | 0 | 0 | NA      |
| John Bel Edwards       | louisianagov    | johnbelforla    | Louisiana      |               | Governor | 0 | 0 | 1 | 0 | 0 | NA      |
| Janet Mills            | govjanetmills   |                 | Maine          |               | Governor | 0 | 0 | 1 | 0 | 0 | NA      |
| Larry Hogan            | govlarryhogan   | larryhogan      | Maryland       |               | Governor | 0 | 0 | 1 | 0 | 0 | NA      |
| Charlie Baker          | massgovernor    | charliebakerma  | Massachusetts  |               | Governor | 0 | 0 | 1 | 0 | 0 | NA      |
| Gretchen Whitmer       | govwhitmer      | gretchenwhitmer | Michigan       |               | Governor | 0 | 0 | 1 | 0 | 0 | NA      |
| Tim Walz               | govtimwalz      | tim_walz        | Minnesot       |               | Governor | 0 | 0 | 1 | 0 | 0 | NA      |
| Tate Reeves            | tatereeves      |                 | Mississippi    |               | Governor | 0 | 0 | 1 | 0 | 0 | NA      |
| Mike Parson            | govparsonmo     | mikeparson      | Missouri       |               | Governor | 0 | 0 | 1 | 0 | 0 | NA      |
| Steve Bullock          | governorbullock | stevebullockmt  | Montana        |               | Governor | 0 | 0 | 1 | 0 | 0 | NA      |
| Pete Ricketts          | govricketts     |                 | Nebraska       |               | Governor | 0 | 0 | 1 | 0 | 0 | NA      |
| Steve Sisolak          | govsisolak      | stevesisolak    | Nevada         |               | Governor | 0 | 0 | 1 | 0 | 0 | NA      |
| Chris Sununu           | govchrissununu  | chrissununu     | New Hampshire  |               | Governor | 0 | 0 | 1 | 0 | 0 | NA      |
| Phil Murphy            | govmurphy       | philmurphynj    | New Jersey     |               | Governor | 0 | 0 | 1 | 0 | 0 | NA      |
| Michelle Lujan Grisham | govmlg          |                 | New Mexico     |               | Governor | 0 | 0 | 1 | 0 | 0 | NA      |
| Andrew Cuomo           | nygovcuomo      |                 | New York       |               | Governor | 0 | 0 | 1 | 0 | 0 | NA      |
| Roy Cooper             | nc_governor     | roycoopernc     | North Carolina |               | Governor | 0 | 0 | 1 | 0 | 0 | NA      |
| Doug Burgum            | dougburgum      | dougfordakota   | North Dakota   |               | Governor | 0 | 0 | 1 | 0 | 0 | NA      |
| Mike DeWine            | govmikedewine   | mikedewine      | Ohio           |               | Governor | 0 | 0 | 1 | 0 | 0 | NA      |
| Kevin Stitt            | govstitt        |                 | Oklahoma       |               | Governor | 0 | 0 | 1 | 0 | 0 | NA      |
| Kate Brown             | oregongovbrown  |                 | Oregon         |               | Governor | 0 | 0 | 1 | 0 | 0 | NA      |
| Tom Wolf               | governortomwolf |                 | Pennsylvania   |               | Governor | 0 | 0 | 1 | 0 | 0 | NA      |
| Wanda Vazquez Garced   | wandavazquezg   |                 | Puerto Rico    |               | Governor | 0 | 0 | 1 | 0 | 0 | NA      |
| Gina Raimondo          | govraimondo     | ginaraimondo    | Rhode Island   |               | Governor | 0 | 0 | 1 | 0 | 0 | NA      |
| Henry McMaster         | henrymcmaster   |                 | South Carolina |               | Governor | 0 | 0 | 1 | 0 | 0 | NA      |
| Kristi Noem            | govkristinoem   | kristinoem      | South Dakota   |               | Governor | 0 | 0 | 1 | 0 | 0 | NA      |
| Bill Lee               | govbilllee      |                 | Tennessee      |               | Governor | 0 | 0 | 1 | 0 | 0 | NA      |
| Greg Abbott            | govabbott       | gregabbott_tx   | Texas          |               | Governor | 0 | 0 | 1 | 0 | 0 | NA      |
| Gary R. Herbert        | govherbert      |                 | Utah           |               | Governor | 0 | 0 | 1 | 0 | 0 | NA      |
| Phil Scott             | govphilscott    |                 | Vermont        |               | Governor | 0 | 0 | 1 | 0 | 0 | NA      |
| Albert Bryan Jr        | govbryan        |                 | Virgin Islands |               | Governor | 0 | 0 | 1 | 0 | 0 | NA      |
| Ralph Northam          | governorva      |                 | Virginia       |               | Governor | 0 | 0 | 1 | 0 | 0 | NA      |
| Jay Inslee             | govinslee       | jayinslee       | Washington     |               | Governor | 0 | 0 | 1 | 0 | 0 | NA      |
| Jim Justice            | wvgovernor      | jimjusticewv    | West Virginia  |               | Governor | 0 | 0 | 1 | 0 | 0 | NA      |
| Tony Evers             | govevers        | tony4wi         | Wisconsin      |               | Governor | 0 | 0 | 1 | 0 | 0 | NA      |
| Mark Gordon            | governorgordon  |                 | Wyoming        |               | Governor | 0 | 0 | 1 | 0 | 0 | NA      |
| Bill de Blasio         | nycmayor        | nycmayorsoffice | New York       | New York City | Mayor    | 0 | 0 | 0 | 1 | 0 | 8336817 |
| Eric Garcetti          | mayorofla       |                 | California     | Los Angeles   | Mayor    | 0 | 0 | 0 | 1 | 0 | 3979576 |
| Lori Lightfoot         | chicagosmayor   |                 | Illinois       | Chicago City  | Mayor    | 0 | 0 | 0 | 1 | 0 | 2693976 |
| Sylvester Turner       | sylvesterturner |                 | Texas          | Houston       | Mayor    | 0 | 0 | 0 | 1 | 0 | 2320268 |
| Kate Gallego           | mayorgallego    |                 | Arizona        | Phoenix       | Mayor    | 0 | 0 | 0 | 1 | 0 | 1680992 |
| Jim Kenney             | phillymayor     |                 | Pennsylvania   | Philadelphia  | Mayor    | 0 | 0 | 0 | 1 | 0 | 1584064 |
| Ron Nirenberg          | ron_nirenberg   |                 | Texas          | San Antonio   | Mayor    | 0 | 0 | 0 | 1 | 0 | 1547253 |
| Kevin Faulconer        | kevin_faulconer | sdmayorsoffice  | California     | San Diego     | Mayor    | 0 | 0 | 0 | 1 | 0 | 1423851 |
| Eric Johnson           | johnson4dallas  | dallasmayor     | Texas          | Dallas        | Mayor    | 0 | 0 | 0 | 1 | 0 | 1343573 |
| Sam Liccardo           | sliccardo       |                 | California     | San Jose      | Mayor    | 0 | 0 | 0 | 1 | 0 | 1021795 |
| Steve Adler            | mayoradler      |                 | Texas          | Austin        | Mayor    | 0 | 0 | 0 | 1 | 0 | 978908  |
| Lenny Curry            | lennycurry      |                 | Florida        | Jacksonville  | Mayor    | 0 | 0 | 0 | 1 | 0 | 911507  |
| Betsy Price            | mayorbetsyprice |                 | Texas          | Fort Worth    | Mayor    | 0 | 0 | 0 | 1 | 0 | 909585  |
| Andrew Ginther         | mayorginther    |                 | Ohio           | Columbus      | Mayor    | 0 | 0 | 0 | 1 | 0 | 898553  |

|                                 |                 |                      |                  |       |   |   |   |   |   |         |
|---------------------------------|-----------------|----------------------|------------------|-------|---|---|---|---|---|---------|
| London Breed                    | londonbreed     | California           | San Francisco    | Mayor | 0 | 0 | 0 | 1 | 0 | 881549  |
| Vi Lyles                        | cltmayor        | North Carolina       | Charlotte        | Mayor | 0 | 0 | 0 | 1 | 0 | 885708  |
| Joe Hogsett                     | indymayorjoe    | Indiana              | Indianapolis     | Mayor | 0 | 0 | 0 | 1 | 0 | 876384  |
| Jenny Durkan                    | mayorjenny      | Washington           | Seattle          | Mayor | 0 | 0 | 0 | 1 | 0 | 753675  |
| Michael Hancock                 | mayorhancock    | Colorado             | Denver           | Mayor | 0 | 0 | 0 | 1 | 0 | 727211  |
| Muriel Bowser                   | mayorbowser     | District of Columbia | Washington       | Mayor | 0 | 0 | 0 | 1 | 0 | 705749  |
| Marty Walsh                     | marty_walsh     | Massachusetts        | Boston           | Mayor | 0 | 0 | 0 | 1 | 0 | 692600  |
| Dee Margo                       | mayor_margo     | Texas                | El Paso          | Mayor | 0 | 0 | 0 | 1 | 0 | 681728  |
| Mike Duggan                     | mayormikeduggan | Michigan             | Detroit          | Mayor | 0 | 0 | 0 | 1 | 0 | 670031  |
| John Cooper                     | johncooper4nash | Tennessee            | Nashville        | Mayor | 0 | 0 | 0 | 1 | 0 | 670820  |
| Ted Wheeler                     | tedwheeler      | Oregon               | Portland         | Mayor | 0 | 0 | 0 | 1 | 0 | 654741  |
| Jim Strickland                  | mayormemphis    | Tennessee            | Memphis          | Mayor | 0 | 0 | 0 | 1 | 0 | 651073  |
| David Holt                      | davidholt       | Oklahoma             | Oklahoma City    | Mayor | 0 | 0 | 0 | 1 | 0 | 655057  |
| Carolyn Goodman                 | mayoroflasvegas | Nevada               | Las Vegas        | Mayor | 0 | 0 | 0 | 1 | 0 | 651319  |
| Greg Fischer                    | louisvillemayor | Kentucky             | Louisville       | Mayor | 0 | 0 | 0 | 1 | 0 | 617638  |
| Bernard C. Jack Young           | mayorbcyoung    | Maryland             | Baltimore        | Mayor | 0 | 0 | 0 | 1 | 0 | 593490  |
| Tom Barrett                     | mayorofmke      | Wisconsin            | Milwaukee City   | Mayor | 0 | 0 | 0 | 1 | 0 | 590157  |
| Tim Keller                      | mayorkeller     | New Mexico           | Albuquerque      | Mayor | 0 | 0 | 0 | 1 | 0 | 560513  |
| Regina Romero                   | tucsonromero    | Arizona              | Tucson           | Mayor | 0 | 0 | 0 | 1 | 0 | 548073  |
| Lee Brand                       | mayorleebrand   | California           | Fresno           | Mayor | 0 | 0 | 0 | 1 | 0 | 531576  |
| John Giles                      | mayorgiles      | Arizona              | Mesa             | Mayor | 0 | 0 | 0 | 1 | 0 | 518012  |
| Darrell Steinburg               | mayor_steinberg | California           | Sacramento       | Mayor | 0 | 0 | 0 | 1 | 0 | 513624  |
| Keisha Lance Bottoms            | keishabottoms   | Georgia              | Atlanta          | Mayor | 0 | 0 | 0 | 1 | 0 | 506811  |
| Quinton Lucas                   | mayorulascasc   | Missouri             | Kansas City      | Mayor | 0 | 0 | 0 | 1 | 0 | 495327  |
| John Suthers                    | johnsuthers     | Colorado             | Colorado Springs | Mayor | 0 | 0 | 0 | 1 | 0 | 478221  |
| Francis X. Suarez               | francissuarez   | Florida              | Miami City       | Mayor | 0 | 0 | 0 | 1 | 0 | 467963  |
| Mary-Ann Baldwin                | maryannbaldwin  | North Carolina       | Raleigh          | Mayor | 0 | 0 | 0 | 1 | 0 | 474069  |
| Jean Stothert                   | jean_stothert   | Nebraska             | Omaha            | Mayor | 0 | 0 | 0 | 1 | 0 | 478192  |
| Robert Garcia                   | longbeachmayor  | California           | Long Beach       | Mayor | 0 | 0 | 0 | 1 | 0 | 462628  |
| Bobby Dyer                      | bobbydyerb      | Virginia             | Virginia Beach   | Mayor | 0 | 0 | 0 | 1 | 0 | 449974  |
| Libby Schaaf                    | libbyschaaf     | California           | Oakland          | Mayor | 0 | 0 | 0 | 1 | 0 | 433031  |
| Jacob Frey                      | mayorfrey       | Minnesota            | Minneapolis      | Mayor | 0 | 0 | 0 | 1 | 0 | 429606  |
| G. T. Bynum                     | gtbynum         | Oklahoma             | Tulsa            | Mayor | 0 | 0 | 0 | 1 | 0 | 401190  |
| Jeff Williams                   | mayorjwilliams  | Texas                | Arlington        | Mayor | 0 | 0 | 0 | 1 | 0 | 398854  |
| Jane Castor                     | janeastor       | Florida              | Tampa            | Mayor | 0 | 0 | 0 | 1 | 0 | 399700  |
| LaToya Cantrell                 | mayorcantrell   | Louisiana            | New Orleans      | Mayor | 0 | 0 | 0 | 1 | 0 | 390144  |
| Dr. Brandon Whipple             | bwhippleks      | Kansas               | Wichita          | Mayor | 0 | 0 | 0 | 1 | 0 | 389938  |
| Karen Goh                       | karengoh        | California           | Bakersfield      | Mayor | 0 | 0 | 0 | 1 | 0 | 384145  |
| Harry Sidhu                     | mayorharrysidhu | California           | Anaheim          | Mayor | 0 | 0 | 0 | 1 | 0 | 350365  |
| Kirk Caldwell                   | mayorkirkhnl    | Hawaii               | Honolulu         | Mayor | 0 | 0 | 0 | 1 | 0 | 345064  |
| Miguel Pulido                   | mayorpulido     | California           | Santa Ana        | Mayor | 0 | 0 | 0 | 1 | 0 | 332318  |
| Rusty Bailey                    | mayor_bailey    | California           | Riverside        | Mayor | 0 | 0 | 0 | 1 | 0 | 331360  |
| Linda Gorton                    | mayorgorton     | Kentucky             | Lexington        | Mayor | 0 | 0 | 0 | 1 | 0 | 323152  |
| Michael Tubbs                   | michaeltubbs    | California           | Stockton         | Mayor | 0 | 0 | 0 | 1 | 0 | 312697  |
| Debra March                     | debra_march     | Nevada               | Henderson        | Mayor | 0 | 0 | 0 | 1 | 0 | 320189  |
| Melvin Carter                   | mayorcarter     | Minnesota            | St. Paul City    | Mayor | 0 | 0 | 0 | 1 | 0 | 308096  |
| Lyda Krewson                    | lydakrewson     | Missouri             | St. Louis        | Mayor | 0 | 0 | 0 | 1 | 0 | 300576  |
| John Cranley                    | johncranley     | Ohio                 | Cincinnati       | Mayor | 0 | 0 | 0 | 1 | 0 | 303940  |
| Bill Peduto                     | billpeduto      | Pennsylvania         | Pittsburgh       | Mayor | 0 | 0 | 0 | 1 | 0 | 300286  |
| Nancy B. Vaughan                | vaughannancy    | North Carolina       | Greensboro       | Mayor | 0 | 0 | 0 | 1 | 0 | 296710  |
| Ethan Berkowitz                 | mayorethananc   | Alaska               | Anchorage        | Mayor | 0 | 0 | 0 | 1 | 0 | 288000  |
| Harry LaRosiliere               | planomayorharry | Texas                | Plano            | Mayor | 0 | 0 | 0 | 1 | 0 | 287677  |
| Leirion Gaylor Baird            | mayorleirion    | Nebraska             | Lincoln          | Mayor | 0 | 0 | 0 | 1 | 0 | 289102  |
| Buddy Dyer                      | orlandomayor    | Florida              | Orlando          | Mayor | 0 | 0 | 0 | 1 | 0 | 287442  |
| Christina L. Shea               | sheaonirvine    | California           | Irvine           | Mayor | 0 | 0 | 0 | 1 | 0 | 287401  |
| Ras J. Baraka                   | rasjbaraka      | New Jersey           | Newark           | Mayor | 0 | 0 | 0 | 1 | 0 | 282011  |
| Wade Kapszukiewicz              | wadekaps        | Ohio                 | Toledo           | Mayor | 0 | 0 | 0 | 1 | 0 | 272779  |
| Steve Schewel                   | stevefordurham  | North Carolina       | Durham           | Mayor | 0 | 0 | 0 | 1 | 0 | 278993  |
| Mary Casilla Salas              | mayormarysalas  | California           | Chula Vista      | Mayor | 0 | 0 | 0 | 1 | 0 | 274492  |
| Tom Henry                       | mayortomhenry   | Indiana              | Fort Wayne       | Mayor | 0 | 0 | 0 | 1 | 0 | 270402  |
| Steven Fulop                    | stevenfulop     | New Jersey           | Jersey City      | Mayor | 0 | 0 | 0 | 1 | 0 | 262075  |
| Rick Kriseman                   | kriseman        | Florida              | St. Petersburg   | Mayor | 0 | 0 | 0 | 1 | 0 | 265351  |
| Pete Saenz                      | mayorpetesaenz  | Texas                | Laredo           | Mayor | 0 | 0 | 0 | 1 | 0 | 262491  |
| Satya Rhodes-Conway             | mayorofmadison  | Wisconsin            | Madison          | Mayor | 0 | 0 | 0 | 1 | 0 | 259680  |
| Kevin Hartke                    | chandlerazmayor | Arizona              | Chandler         | Mayor | 0 | 0 | 0 | 1 | 0 | 261165  |
| Byron W. Brown                  | byronwbrown     | New York             | Buffalo          | Mayor | 0 | 0 | 0 | 1 | 0 | 255284  |
| Dan Pope                        | mayordanpope    | Texas                | Lubbock          | Mayor | 0 | 0 | 0 | 1 | 0 | 258862  |
| Jim Lane                        | mayorjimlane    | Arizona              | Scottsdale       | Mayor | 0 | 0 | 0 | 1 | 0 | 258069  |
| Hillary Schieve                 | mayorschieve    | Nevada               | Reno             | Mayor | 0 | 0 | 0 | 1 | 0 | 255601  |
| Jerry Weiers                    | mayorweiers     | Arizona              | Glendale         | Mayor | 0 | 0 | 0 | 1 | 0 | 252381  |
| Jenn Daniels                    | gilbertazmayor  | Arizona              | Gilbert          | Mayor | 0 | 0 | 0 | 1 | 0 | 254114  |
| John Lee                        | mayorjohnlee    | Nevada               | North Las Vegas  | Mayor | 0 | 0 | 0 | 1 | 0 | 251974  |
| Kenneth Alexander               | kennyaalexander | Virginia             | Norfolk          | Mayor | 0 | 0 | 0 | 1 | 0 | 242742  |
| Carolos Hernandez               | mayorhialeah    | Florida              | Hialeah          | Mayor | 0 | 0 | 0 | 1 | 0 | 233339  |
| Lily Mei                        | lilymei4fremont | California           | Fremont          | Mayor | 0 | 0 | 0 | 1 | 0 | 241110  |
| Lauren McLean                   | laurenmclean    | Idaho                | Boise            | Mayor | 0 | 0 | 0 | 1 | 0 | 228959  |
| Levar Stoney                    | levarstoney     | Virginia             | Richmond         | Mayor | 0 | 0 | 0 | 1 | 0 | 230436  |
| Sharon Weston Broome            | mayorbroome     | Louisiana            | Baton Rouge      | Mayor | 0 | 0 | 0 | 1 | 0 | 220236  |
| David Condon                    | david_a_condon  | Washington           | Spokane          | Mayor | 0 | 0 | 0 | 1 | 0 | 222081  |
| Michael S. Purzycki             | mikepurzycki    | Delaware             | Wilmington       | Mayor | 0 | 0 | 0 | 1 | 0 | 70166   |
| Miro Weinberger                 | btvmayor        | Vermont              | Burlington       | Mayor | 0 | 0 | 0 | 1 | 0 | 42819   |
| Amy Goodwin                     | amysgoodwin     | West Virginia        | Charleston       | Mayor | 0 | 0 | 0 | 1 | 0 | 46536   |
| Marian J. Orr                   | gofishwyo       | Wyoming              | Cheyenne         | Mayor | 0 | 0 | 0 | 1 | 0 | 64235   |
| NYC Emergency Management        | nycemergencymgt | New York             | New York City    | Local | 0 | 0 | 0 | 0 | 1 | 8336817 |
| Emergency Management Department | readyla         | California           | Los Angeles      | Local | 0 | 0 | 0 | 0 | 1 | 3979576 |



|                                                    |                 |                |                      |                  |       |   |   |   |   |   |         |
|----------------------------------------------------|-----------------|----------------|----------------------|------------------|-------|---|---|---|---|---|---------|
| Office of Emergency Management & Communications    | chicagoemc      | notifychicago  | Illinois             | Chicago City     | Local | 0 | 0 | 0 | 0 | 1 | 2693976 |
| Office of Emergency Management                     | houstoem        | alerthouston   | Texas                | Houston          | Local | 0 | 0 | 0 | 0 | 1 | 2320268 |
| Office of Homeland Security & Emergency Management | maricopaemerg   |                | Arizona              | Phoenix          | Local | 0 | 0 | 0 | 0 | 1 | 1680992 |
| Office of Emergency Management                     | philaoem        |                | Pennsylvania         | Philadelphia     | Local | 0 | 0 | 0 | 0 | 1 | 1584064 |
| Office of Emergency Management                     | sanantonioem    |                | Texas                | San Antonio      | Local | 0 | 0 | 0 | 0 | 1 | 1547253 |
| Office of Emergency Services                       | readysandiego   |                | California           | San Diego        | Local | 0 | 0 | 0 | 0 | 1 | 1423851 |
| Office of Emergency Management                     | dallasoem       |                | Texas                | Dallas           | Local | 0 | 0 | 0 | 0 | 1 | 1343573 |
| Office of Emergency Management                     | cityofsanjose   | scc_oes        | California           | San Jose         | Local | 0 | 0 | 0 | 0 | 1 | 1021795 |
| Homeland Security and Emergency Management         | austinhsem      |                | Texas                | Austin           | Local | 0 | 0 | 0 | 0 | 1 | 978908  |
| City of Jacksonville                               | jaxready        |                | Florida              | Jacksonville     | Local | 0 | 0 | 0 | 0 | 1 | 911507  |
| Emergency Preparedness                             | fwomem          |                | Texas                | Fort Worth       | Local | 0 | 0 | 0 | 0 | 1 | 909585  |
| Emergency Management Office                        | fwomem          |                | Texas                | Fort Worth       | Local | 0 | 0 | 0 | 0 | 1 | 909585  |
| The Office of Emergency Preparedness               | cphoep          |                | Ohio                 | Columbus         | Local | 0 | 0 | 0 | 0 | 1 | 898553  |
| Department of Emergency Management                 | sf_emergency    |                | California           | San Francisco    | Local | 0 | 0 | 0 | 0 | 1 | 881549  |
| Charlotte-Mecklenburg Emergency Management         | charmckem       | preppete_cmemo | North Carolina       | Charlotte        | Local | 0 | 0 | 0 | 0 | 1 | 885708  |
| Indianapolis Office of Public Health and Safety    | indyophs        |                | Indiana              | Indianapolis     | Local | 0 | 0 | 0 | 0 | 1 | 876384  |
| Office of Emergency Management                     | oemseattle      |                | Washington           | Seattle          | Local | 0 | 0 | 0 | 0 | 1 | 753675  |
| Office of Emergency Management                     | denveroem       |                | Colorado             | Denver           | Local | 0 | 0 | 0 | 0 | 1 | 727211  |
| Homeland Security and Emergency Management         | dc_hsema        |                | District of Columbia | Washington       | Local | 0 | 0 | 0 | 0 | 1 | 705749  |
| Agency                                             | dc_hsema        |                | District of Columbia | Washington       | Local | 0 | 0 | 0 | 0 | 1 | 705749  |
| Emergency Management                               | alertboston     |                | Massachusetts        | Boston           | Local | 0 | 0 | 0 | 0 | 1 | 692600  |
| Office of Emergency Management                     | elpasooem       |                | Texas                | El Paso          | Local | 0 | 0 | 0 | 0 | 1 | 681728  |
| Homeland Security and Emergency Management         | cityofdetroit   |                | Michigan             | Detroit          | Local | 0 | 0 | 0 | 0 | 1 | 670031  |
| Office of Emergency Management                     | nashvilleoc     |                | Tennessee            | Nashville        | Local | 0 | 0 | 0 | 0 | 1 | 670820  |
| Portland Bureau of Emergency Management            | portlandbem     |                | Oregon               | Portland         | Local | 0 | 0 | 0 | 0 | 1 | 654741  |
| Office of Emergency Management                     | memphisoem      |                | Tennessee            | Memphis          | Local | 0 | 0 | 0 | 0 | 1 | 651073  |
| Office of Emergency Management                     | cityofokc       |                | Oklahoma             | Oklahoma City    | Local | 0 | 0 | 0 | 0 | 1 | 655057  |
| Emergency Management                               | civalerts       |                | Nevada               | Las Vegas        | Local | 0 | 0 | 0 | 0 | 1 | 651319  |
| Emergency Management Agency                        | loumetroes      |                | Kentucky             | Louisville       | Local | 0 | 0 | 0 | 0 | 1 | 617638  |
| Mayor's Office of Emergency Management             | baltimoreoem    |                | Maryland             | Baltimore        | Local | 0 | 0 | 0 | 0 | 1 | 593490  |
| Office of Emergency Management                     | readymke        |                | Wisconsin            | Milwaukee City   | Local | 0 | 0 | 0 | 0 | 1 | 590157  |
| Office of Emergency Management                     | abq_oem         |                | New Mexico           | Albuquerque      | Local | 0 | 0 | 0 | 0 | 1 | 560513  |
| Office of Emergency Management & Homeland Security | toemhs          |                | Arizona              | Tucson           | Local | 0 | 0 | 0 | 0 | 1 | 548073  |
| Office of Emergency Services                       | fresnooes       |                | California           | Fresno           | Local | 0 | 0 | 0 | 0 | 1 | 531576  |
| Maricopa County Department of Emergency Management | maricopaemerg   |                | Arizona              | Mesa             | Local | 0 | 0 | 0 | 0 | 1 | 518012  |
| Office of Emergency Management                     | sacramentooes   |                | California           | Sacramento       | Local | 0 | 0 | 0 | 0 | 1 | 513624  |
| Office of Emergency Preparedness                   | atlpreparedness |                | Georgia              | Atlanta          | Local | 0 | 0 | 0 | 0 | 1 | 506811  |
| Office of Emergency Management                     | kcmooem         |                | Missouri             | Kansas City      | Local | 0 | 0 | 0 | 0 | 1 | 495327  |
| Pikes Peak Regional Office of Emergency Management | cityofcos       |                | Colorado             | Colorado Springs | Local | 0 | 0 | 0 | 0 | 1 | 478221  |
| Miami-Dade County Office of Emergency Management   | miamidadeem     |                | Florida              | Miami City       | Local | 0 | 0 | 0 | 0 | 1 | 467963  |
| Emergency Management                               | wakegov         |                | North Carolina       | Raleigh          | Local | 0 | 0 | 0 | 0 | 1 | 474069  |
| Douglas County Emergency Management                | dcema_nebraska  |                | Nebraska             | Omaha            | Local | 0 | 0 | 0 | 0 | 1 | 478192  |
| Disaster Preparedness                              | lbdisasterprep  |                | California           | Long Beach       | Local | 0 | 0 | 0 | 0 | 1 | 462628  |
| Office of Emergency Management                     | cityofvabeach   |                | Virginia             | Virginia Beach   | Local | 0 | 0 | 0 | 0 | 1 | 449974  |

|                                                                           |                 |                |                |       |   |   |   |   |   |        |
|---------------------------------------------------------------------------|-----------------|----------------|----------------|-------|---|---|---|---|---|--------|
| Emergency Management Services Division                                    | oakland911      | California     | Oakland        | Local | 0 | 0 | 0 | 0 | 1 | 433031 |
| Hennepin County Emergency Management                                      | hennepinem      | Minnesota      | Minneapolis    | Local | 0 | 0 | 0 | 0 | 1 | 429606 |
| Tulsa Area Emergency Management Agency                                    | cityoftulsagov  | Oklahoma       | Tulsa          | Local | 0 | 0 | 0 | 0 | 1 | 401190 |
| Office of Emergency Management                                            | cityofarlington | Texas          | Arlington      | Local | 0 | 0 | 0 | 0 | 1 | 398854 |
| Office of Emergency Management                                            | alertytampa     | Florida        | Tampa          | Local | 0 | 0 | 0 | 0 | 1 | 399700 |
| Office of Homeland Security & Emergency Preparedness                      | nolaready       | Louisiana      | New Orleans    | Local | 0 | 0 | 0 | 0 | 1 | 390144 |
| Sedgwick County Emergency Management                                      | sedgwickcounty  | Kansas         | Wichita        | Local | 0 | 0 | 0 | 0 | 1 | 389938 |
| Emergency Management /Cuyahoga County                                     | cuyahogaoem     | Ohio           | Cleveland City | Local | 0 | 0 | 0 | 0 | 1 | 381009 |
| Kern County Fire Department's Office of Emergency Services                | kerncountyfire  | California     | Bakersfield    | Local | 0 | 0 | 0 | 0 | 1 | 384145 |
| Office of Emergency Management/Adams County                               | adamsoem        | Colorado       | Aurora         | Local | 0 | 0 | 0 | 0 | 1 | 379289 |
| Emergency Management & Preparedness/Orange County, CA                     | ocsheriff       | California     | Anaheim        | Local | 0 | 0 | 0 | 0 | 1 | 350365 |
| Department of Emergency Management                                        | oahu_dem        | Hawaii         | Honolulu       | Local | 0 | 0 | 0 | 0 | 1 | 345064 |
| Emergency Management/Orange County, CA                                    | ocsheriff       | California     | Santa Ana      | Local | 0 | 0 | 0 | 0 | 1 | 332318 |
| Emergency Management Department                                           | rivcoready      | California     | Riverside      | Local | 0 | 0 | 0 | 0 | 1 | 331360 |
| Office of Emergency Management                                            | readycc         | Texas          | Corpus Christi | Local | 0 | 0 | 0 | 0 | 1 | 326586 |
| Emergency Management                                                      | lexkyem         | Kentucky       | Lexington      | Local | 0 | 0 | 0 | 0 | 1 | 323152 |
| Office of Emergency Services                                              | stocktonupdates | California     | Stockton       | Local | 0 | 0 | 0 | 0 | 1 | 312697 |
| Emergency Management                                                      | readystpaul     | Minnesota      | St. Paul City  | Local | 0 | 0 | 0 | 0 | 1 | 308096 |
| Emergency Management Agency                                               | cityema         | Missouri       | St. Louis      | Local | 0 | 0 | 0 | 0 | 1 | 300576 |
| Hamilton County Emergency Management Agency and Homeland Security         | hcema           | Ohio           | Cincinnati     | Local | 0 | 0 | 0 | 0 | 1 | 303940 |
| Office of Emergency Management & Homeland Security                        | pittsburghoemhs | Pennsylvania   | Pittsburgh     | Local | 0 | 0 | 0 | 0 | 1 | 300286 |
| Emergency Management                                                      | greensborocity  | North Carolina | Greensboro     | Local | 0 | 0 | 0 | 0 | 1 | 296710 |
| Office of Emergency Management                                            | anchorage_oem   | Alaska         | Anchorage      | Local | 0 | 0 | 0 | 0 | 1 | 288000 |
| Emergency Management                                                      | planoem         | Texas          | Plano          | Local | 0 | 0 | 0 | 0 | 1 | 287677 |
| Lancaster County Emergency Management                                     | lancastercoema  | Nebraska       | Lincoln        | Local | 0 | 0 | 0 | 0 | 1 | 289102 |
| Emergency Management                                                      | citybeautiful   | Florida        | Orlando        | Local | 0 | 0 | 0 | 0 | 1 | 287442 |
| Office of Emergency Management/Orange County, CA                          | ocsheriff       | California     | Irvine         | Local | 0 | 0 | 0 | 0 | 1 | 287401 |
| Emergency Management                                                      | cityofnewarknj  | New Jersey     | Newark         | Local | 0 | 0 | 0 | 0 | 1 | 282011 |
| Lucas County Emergency Management Agency                                  | lucascoema      | Ohio           | Toledo         | Local | 0 | 0 | 0 | 0 | 1 | 272779 |
| Emergency Management Department                                           | alertydurham    | North Carolina | Durham         | Local | 0 | 0 | 0 | 0 | 1 | 278993 |
| Fire Department's Department of Emergency Management                      | chulavistafd    | California     | Chula Vista    | Local | 0 | 0 | 0 | 0 | 1 | 274492 |
| Allen County Department of Health's Emergency Preparedness                | allencountyinfo | Indiana        | Fort Wayne     | Local | 0 | 0 | 0 | 0 | 1 | 270402 |
| Hudson County Office of Emergency Management                              | hudconjoem      | New Jersey     | Jersey City    | Local | 0 | 0 | 0 | 0 | 1 | 262075 |
| Pinellas County Emergency Management                                      | pinellasem      | Florida        | St. Petersburg | Local | 0 | 0 | 0 | 0 | 1 | 265351 |
| Dane County Emergency Management                                          | danecountyem    | Wisconsin      | Madison        | Local | 0 | 0 | 0 | 0 | 1 | 259680 |
| Maricopa County Department of Emergency Management                        | maricopaemerg   | Arizona        | Chandler       | Local | 0 | 0 | 0 | 0 | 1 | 261165 |
| Erie County Emergency Management Civil Defense/Homeland Security Division | eriecountyesu   | New York       | Buffalo        | Local | 0 | 0 | 0 | 0 | 1 | 255284 |
| Office of Emergency Management                                            | cityoflubbock   | Texas          | Lubbock        | Local | 0 | 0 | 0 | 0 | 1 | 258862 |
| Office of Emergency Management                                            | scottsdaleazgov | Arizona        | Scottsdale     | Local | 0 | 0 | 0 | 0 | 1 | 258069 |

|                                                                       |                 |               |                |                 |       |   |   |   |   |   |        |
|-----------------------------------------------------------------------|-----------------|---------------|----------------|-----------------|-------|---|---|---|---|---|--------|
| Washoe County Emergency Management                                    | washoecounty    | covid19washoe | Nevada         | Reno            | Local | 0 | 0 | 0 | 0 | 1 | 255601 |
| Emergency Management                                                  | glendaleaz      |               | Arizona        | Glendale        | Local | 0 | 0 | 0 | 0 | 1 | 252381 |
| Emergency Management                                                  | gilbertyourtown |               | Arizona        | Gilbert         | Local | 0 | 0 | 0 | 0 | 1 | 254114 |
| Forsyth County Emergency Management                                   | readyforsyth    |               | North Carolina | Winston-Salem   | Local | 0 | 0 | 0 | 0 | 1 | 247945 |
| Emergency Management                                                  | cnlv            |               | Nevada         | North Las Vegas | Local | 0 | 0 | 0 | 0 | 1 | 251974 |
| Department of Emergency Management                                    | norfolkdepr     |               | Virginia       | Norfolk         | Local | 0 | 0 | 0 | 0 | 1 | 242742 |
| Fire Department's Emergency Management                                | chesapeakefire  |               | Virginia       | Chesapeake      | Local | 0 | 0 | 0 | 0 | 1 | 244835 |
| Office of Emergency Management                                        | thecityofirving |               | Texas          | Irving          | Local | 0 | 0 | 0 | 0 | 1 | 239798 |
| Office of Emergency Services                                          | fremont_ca      |               | California     | Fremont         | Local | 0 | 0 | 0 | 0 | 1 | 241110 |
| Ada County Emergency Management & Community Resilience                | adacountyem     |               | Idaho          | Boise           | Local | 0 | 0 | 0 | 0 | 1 | 228959 |
| Office of Emergency Management                                        | rfdva           |               | Virginia       | Richmond        | Local | 0 | 0 | 0 | 0 | 1 | 230436 |
| Mayor's Office of Homeland Security Emergency Preparedness            | redstickready   |               | Louisiana      | Baton Rouge     | Local | 0 | 0 | 0 | 0 | 1 | 220236 |
| Greater Spokane Emergency Management                                  | gegemergencygmt |               | Washington     | Spokane         | Local | 0 | 0 | 0 | 0 | 1 | 222081 |
| Office of Emergency Management                                        | cityofwilmd     |               | Delaware       | Wilmington      | Local | 0 | 0 | 0 | 0 | 1 | 70166  |
| Office of Emergency Management/cumberland county emergency management | cityportland    | ccemaready    | Maine          | Portland        | Local | 0 | 0 | 0 | 0 | 1 | 66215  |
| Homeland Security and Emergency Management/kanawha county em          | kanawhaus       |               | West Virginia  | Charleston      | Local | 0 | 0 | 0 | 0 | 1 | 46536  |
| Laramie County Emergency Management                                   | cityoflaramie   |               | Wyoming        | Cheyenne        | Local | 0 | 0 | 0 | 0 | 1 | 64235  |
